# Supplementary material for: An excellent bipolar host material exhibiting EQE of 24.0% with small efficiency roll-off in solution-processable thermally activated delayed fluorescence OLEDs
Source: Royal Society of Chemistry journal article supplement (doi:10.1039/c9tc04812j), 2019-01-01
Supplement: c9tc04812j1.pdf [file c9tc04812j1.pdf]

## Electronic supplementary information

### Excellent Bipolar Host Material Exhibiting EQE of 24.0% with Small Efficiency Roll-off in Solution-processable Thermally Activated Delayed Fluorescence OLEDs

Mallesham Godumala, Jiwon Yoon, Cheol Hun Jeong, Chiho Lee, Ji-Eun Jeong, Sungnam Park,  
Han Young Woo, Min Ju Cho and Dong Hoon Choi\*

Department of Chemistry, Research Institute for Natural Sciences, Korea University,  
145 Anam-ro, Seongbuk-gu, Seoul, 02841, Republic of Korea.

E-mail: [dhchoi8803@korea.ac.kr](mailto:dhchoi8803@korea.ac.kr); Fax: +82-2-925-4284, Tel: +82-2-3290-3140.

### Figures and Tables

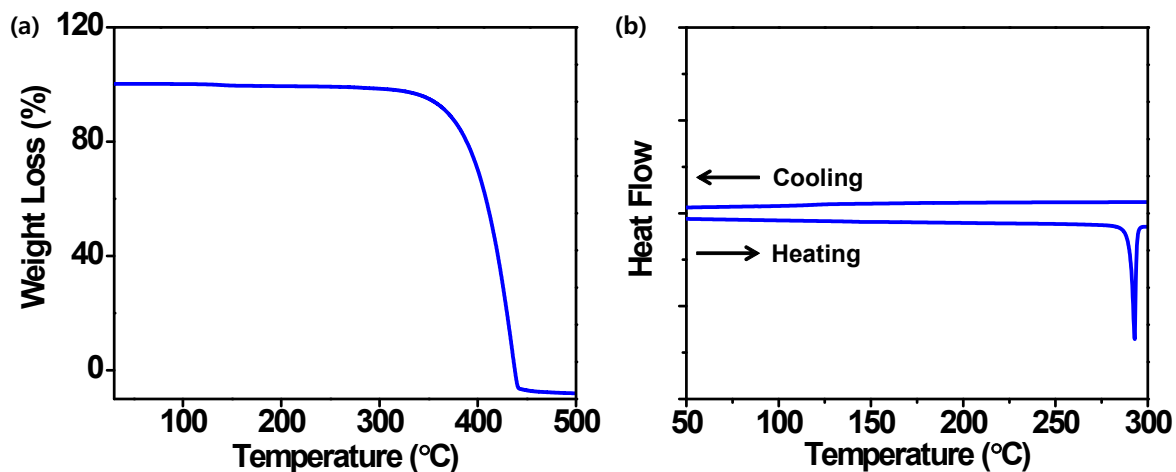

Fig. S1 TGA (a) and DSC (b) thermograms of APC.

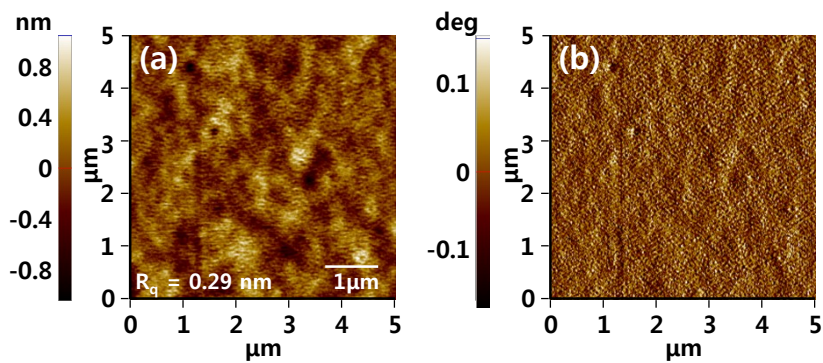

Fig. S2 AFM (a) topography and (b) phase images ( $5 \times 5 \mu\text{m}$ ) of APC:t4CzIPN blend film (6.0 wt%).

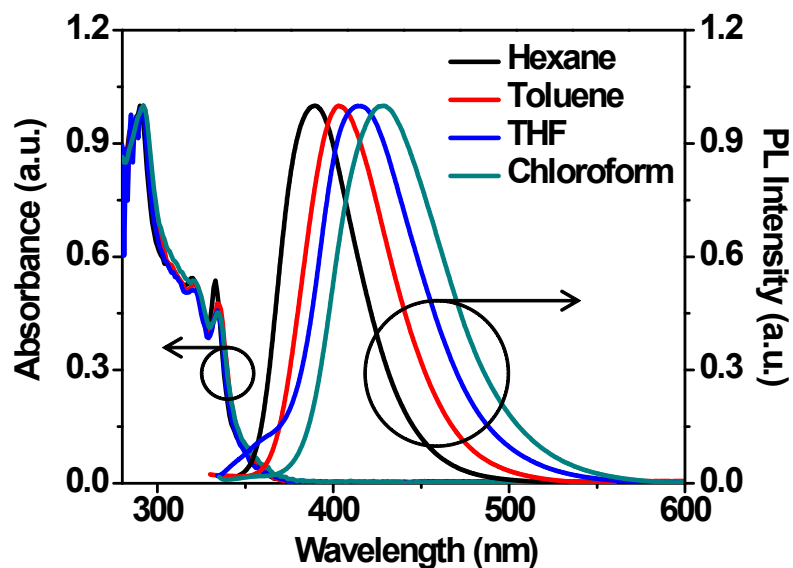

**Fig. S3** UV-Vis absorption and photoluminescence spectra of **APC** in different polar solvents.

**Table S1.** Photophysical data of **APC** in different polar solvents.

| Host       | Hexane <sup>a/b</sup> (nm) | Toluene <sup>a/b</sup> (nm) | THF <sup>a/b</sup> (nm) | Chloroform <sup>a/b</sup> (nm) |
|------------|----------------------------|-----------------------------|-------------------------|--------------------------------|
| <b>APC</b> | 290, 317, 333/390          | 292, 321, 334/403           | 292, 320, 334/414       | 292, 320, 334/429              |

<sup>a</sup> Absorbance. <sup>b</sup> PL value

**Table S2.** Photophysical properties and kinetic parameters of t4CzIPN-doped (6.0 wt%) **APC** films.

| Comp.      | $k_p$ ( $\times 10^7 \text{ s}^{-1}$ ) <sup>a</sup> | $k_d$ ( $\times 10^5 \text{ s}^{-1}$ ) <sup>b</sup> | $k_r^S$ ( $\times 10^7 \text{ s}^{-1}$ ) <sup>c</sup> | $k_{ISC}$ ( $\times 10^7 \text{ s}^{-1}$ ) <sup>d</sup> | $k_{RISC}$ ( $\times 10^5 \text{ s}^{-1}$ ) <sup>e</sup> | $k_{nr}^T$ ( $\times 10^5 \text{ s}^{-1}$ ) <sup>f</sup> |
|------------|-----------------------------------------------------|-----------------------------------------------------|-------------------------------------------------------|---------------------------------------------------------|----------------------------------------------------------|----------------------------------------------------------|
| <b>APC</b> | 3.96                                                | 3.4                                                 | 0.41                                                  | 3.55                                                    | 27                                                       | 0.61                                                     |

<sup>a</sup> Prompt emission rate constant. <sup>b</sup> Delayed emission rate constant. <sup>c</sup> Radiative decay rate constant of the singlet excited state. <sup>d</sup> Intersystem crossing rate constant. <sup>e</sup> Reverse intersystem crossing rate constant. <sup>f</sup> Non-radiative decay rate constant for triplet excited state.

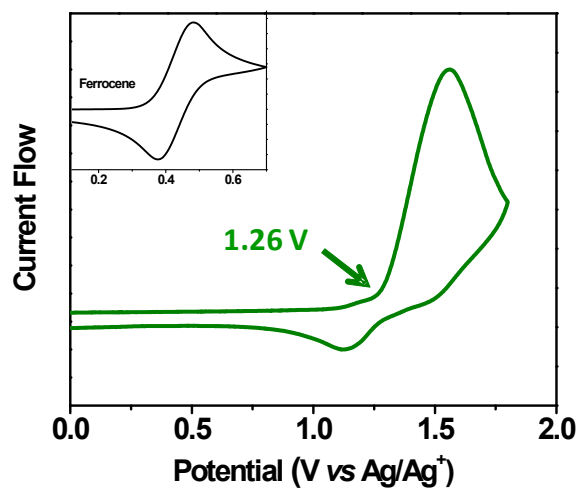

Fig. S4 Cyclic voltammogram of the APC in the film state (inset shows the corresponding plot of ferrocene).

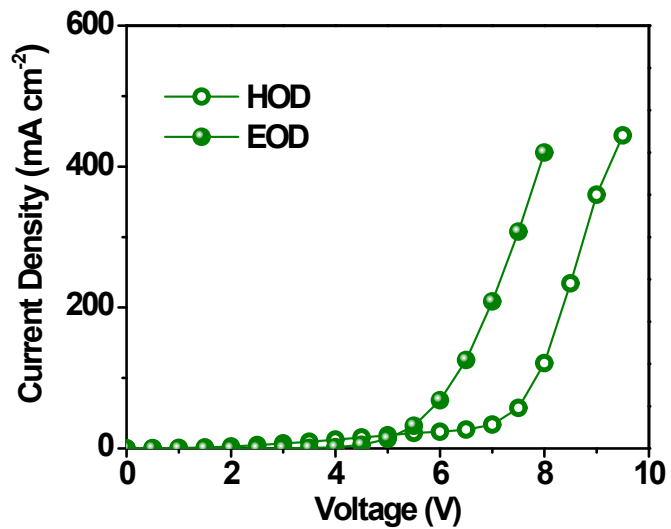

Fig. S5 Hole only and electron devices of APC.

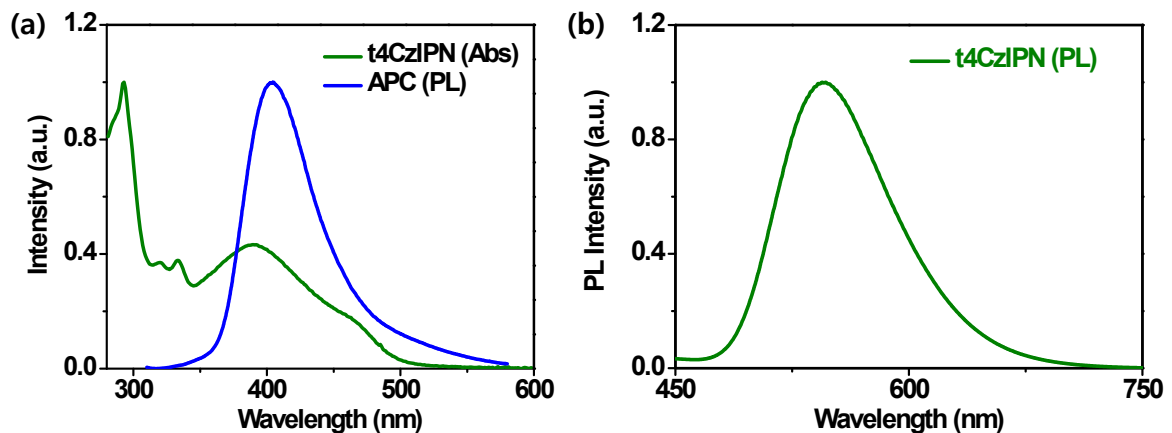

**Fig. S6** (a) UV-Vis absorption spectrum of t4CzIPN emitter and PL spectrum of **APC** host in the film state, and (b) PL spectrum of t4CzIPN in the film state.

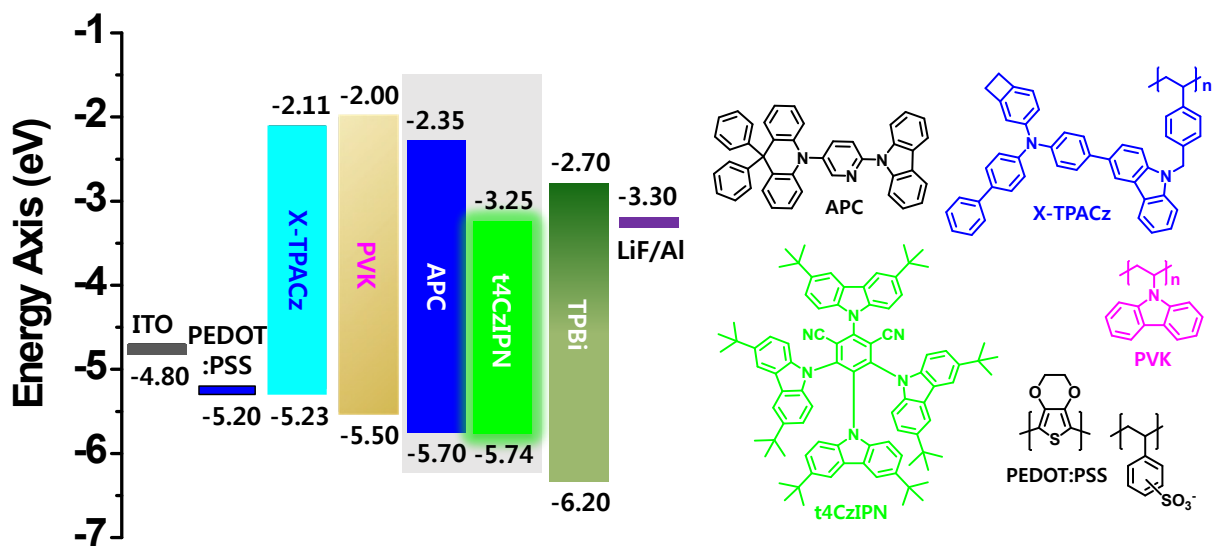

**Fig. S7** Energy level diagram and chemical structures of the materials used in this study.

**Table S3.** Comparison of the state-of-the-art performing solution-processed TADF OLEDs.

| S. No.    | Host         | Dopant         | EQE <sub>max</sub><br>(%) | EQE <sub>500</sub><br>(%) | EQE <sub>1000</sub><br>(%) | Roll-off<br>(%) <sup>a</sup> | Reference           |
|-----------|--------------|----------------|---------------------------|---------------------------|----------------------------|------------------------------|---------------------|
| <b>1.</b> | <b>APC</b>   | <b>t4CzIPN</b> | <b>24.0</b>               | <b>23.1</b>               | <b>21.7</b>                | <b>9.6</b>                   | <b>Present work</b> |
| 2.        | CBP          | TBP-DMA        | 22.1                      | --                        | 20.3                       | 8.0                          | 1                   |
| 3.        | DCzPPy       | DACT-II        | 30.8                      | 29.0                      | 27.0                       | 12.0                         | 2                   |
| 4.        | SiCz         | t4CzIPN        | 18.3                      | ~15.0                     | 12.0                       | 34                           | 3                   |
| 5.        | mCPDPO       | t4CzIPN        | 18.8                      | 16.6                      | 12.4                       | 34                           | 4                   |
| 6.        | mCP          | 4CzIPN         | 21.0                      | <16.0                     | <16.0                      | >24                          | 5                   |
| 7.        | Cz-3CzCN     | CzCzCN         | 23.8                      | ~17.0                     | 12.6                       | 47                           | 6                   |
| 8.        | Cz-3CzCN     | Cz-4CzCN       | 23.5                      | ~12.0                     | 7.8                        | 67                           | 6                   |
| 9.        | mCP          | COPO1          | 20.1                      | ~10.0                     | ~3.0                       | ~85                          | 7                   |
| 10.       | TPA-3/PO-T2T | 9PhFDPhTz      | 24.0                      | 15.5                      | 10.1                       | 58.0                         | 8                   |
| 11.       | PVK:OXD-7    | 5              | 23.8                      | ~18.0                     | 16.5                       | 31                           | 9                   |
| 12.       | DPOBBPE      | 5CzCN          | 25.8                      | ~19.0                     | ~12.0                      | ~53                          | 10                  |
| 13.       | SiCz         | 4CzFCN         | 20.0                      | <1.0                      | --                         | --                           | 11                  |
| 14.       | CzSi         | MA-TA          | 22.1                      | --                        | --                         | --                           | 12                  |

<sup>a</sup> Roll-off from maximum value to 1000 cd m<sup>-2</sup> brightness.

**Table S4.** Comparison of the maximum performance and roll-off behavior at 1000 cd m<sup>-2</sup> for t4CzIPN emitter fabricated through the solution as well as vacuum process.

| S. No.    | Host       | Dopant         | Fabrication<br>process | EQE <sub>max</sub><br>(%) | EQE <sub>1000</sub><br>(%) | Roll-off<br>(%) | Reference           |
|-----------|------------|----------------|------------------------|---------------------------|----------------------------|-----------------|---------------------|
| <b>1.</b> | <b>APC</b> | <b>t4CzIPN</b> | <b>Solution</b>        | <b>24.0</b>               | <b>21.7</b>                | <b>9.6</b>      | <b>Present work</b> |
| 2.        | IAPC       | t4CzIPN        | Solution               | 19.2                      | 17.5                       | 9.0             | 13                  |
| 3.        | SICT       | t4CzIPN        | Solution               | 19.2                      | 12.4                       | 36.0            | 14                  |
| 4.        | mCPDPO     | t4CzIPN        | Solution               | 18.8                      | 12.4                       | 34.0            | 4                   |
| 5.        | SiCz       | t4CzIPN        | Solution               | 18.3                      | 12.0                       | 34.0            | 3                   |
| 6.        | SiCz       | t4CzIPN        | Vacuum                 | 17.1                      | 13.5                       | 21.0            | 3                   |
| 7.        | PE-PCzP    | t4CzIPN        | Solution               | 17.1                      | 16.5                       | 4.0             | 15                  |

## References

1. X. Cai, D. Chen, K. Gao, L. Gan, Q. Yin, Z. Qiao, Z. Chen, X. Jiang and S.-J. Su, *Adv. Funct. Mater.*, 2018, **28**, 1704927-1704935.
2. K.-W. Tsai, M.-K. Hung, Y.-H. Mao and S.-A. Chen, *Adv. Funct. Mater.*, 2019, **29**, 1901025.
3. Y. J. Cho, K. S. Yook and J. Y. Lee, *Adv. Mater.*, 2014, **26**, 6642-6646.
4. M. Godumala, S. Choi, S. K. Kim, S. W. Kim, J. H. Kwon, M. J. Cho and D. H. Choi, *J. Mater. Chem. C*, 2018, **6**, 10000-10019.
5. T. Zhou, G. Xie, S. Gong, M. Huang, J. Luo and C. Yang, *ACS Appl. Mater. Interfaces*, 2017, **9**, 34139-34145.
6. X. Ban, A. Zhu, T. Zhang, Z. Tong, W. Jiang and Y. Sun, *Chem. Commun.*, 2017, **53**, 11834-11837.
7. Z. Ren, R. S. Nobuyasu, F. B. Dias, A. P. Monkman, S. Yan and M. R. Bryce, *Macromolecules*, 2016, **49**, 5452-5460.
8. J. Zhao, C. Zheng, Y. Zhou, C. Li, J. Ye, X. Du, W. Li, Z. He, M. Zhang, H. Lin, S. Tao and X. Zhang, *Mat. Horizons*, 2019, DOI: 10.1039/c9mh00373h.
9. W.-P. To, D. Zhou, G. S. M. Tong, G. Cheng, C. Yang and C.-M. Che, *Angew. Chem. Int. Ed.*, 2017, **56**, 14036-14041.
10. S. K. Jeon, H.-J. Park and J. Y. Lee, *ACS Appl. Mater. Interfaces*, 2018, **10**, 5700-5705.
11. Y. J. Cho, B. D. Chin, S. K. Jeon and J. Y. Lee, *Adv. Funct. Mater.*, 2015, **25**, 6786-6792.
12. Y. Wada, S. Kubo and H. Kaji, *Adv. Mater.*, 2018, **30**, 1705641-1705648.
13. C. H. Jeong, M. Godumala, J. Yoon, S. Choi, Y. W. Kim, D. H. Choi, M. J. Cho and D. H. Choi, *ACS Appl. Mater. Interfaces*, 2019, **11**, 17602-17609.
14. S. Choi, J. Yoon, M. Godumala, H. J. Kim, S. H. Park, S. K. Kim, H. Lee, J. H. Kwon, M. J. Cho and D. H. Choi, *Dyes Pigments*, 2019, **167**, 120-126.
15. S. Shao, S. Wang, X. Xu, Y. Yang, J. Lv, J. Ding, L. Wang, X. Jing and F. Wang, *Macromolecules*, 2019, **52**, 3394-3403.
